# Supplementary material for: Cornual Pregnancy: Results of a Single-Center Retrospective Experience and Systematic Review on Reproductive Outcomes
Source: MDPI journal article supplement (doi:10.3390/medicina60010186), 2024-01-21
Supplement: s1 [file s1]

| Author                  | Study design and sample representativeness | Sampling technique | Evaluation of the description of the medical treatment or surgical technique used | Quality of population description | Incomplete outcome data | Total score | Risk of bias |
|-------------------------|--------------------------------------------|--------------------|-----------------------------------------------------------------------------------|-----------------------------------|-------------------------|-------------|--------------|
| Ng et al. [15]          | -                                          | -                  | ★                                                                                 | ★                                 | ★                       | ★★★         | Low          |
| Nikodijevic et al. [16] | -                                          | -                  | ★                                                                                 | ★                                 | -                       | ★★          | High         |

**Table S2.** Risk of bias assessment.
